# Supplementary material for: Evidence for Adaptive Introgression of Disease Resistance Genes Among Closely Related Arabidopsis Species
Source: G3 (Bethesda). 2017 Jun 19;7(8):2677–83. doi: 10.1534/g3.117.043984 (PMC5555472; doi:10.1534/g3.117.043984)
Supplement: Supplementary file 2 [file 2677TableS1.xlsx]

## Sheet: Sheet1
Resistance genes	At1g12220	At1g52660	At1g76950	At2g34930	At3g07040	At3g46710	At3g46730	At4g23440	At4g26090	At5g47250				Reference genes	CAD	CHI	CHS	DFR	F3H	FAH1	GS	MAM-L	At1g01040	At1g03560	At1g04650	At1g06520	At1g06530	At1g10900	At1g10980	At1g11050	At1g15240	At1g59720	At1g62310	At1g62390	At1g62520	At1g64170	At1g72390	At1g74600	At2g16870	At2g23170	At2g26140	At2g26730	At2g43680	At2g44900	At2g46550	At3g20820	At3g23590	At3g48690	At3g50740
											Average		Average
#sequences (lyrata)	50	52	56	56	56	13	40	56	50	54	48.3		67.0789	#sequences (lyrata)	8	10	12	10	10	10	13	12	72	84	84	106	44	80	108	120	40	54	76	108	112	112	124	72	52	114	100	32	50	72	82	48	90	80	126
# sites	793	702	572	729	793	808	701	677	783	695	725.3		512.868	# sites	957	264	1174	346	450	1066	908	261	437	484	458	445	447	481	495	468	426	483	458	483	423	423	368	513	544	448	435	349	514	447	440	491	523	447	444
S (lyrata)	42	23	12	18	15	75	124	13	43	158	52.3		17.5789	S (lyrata)	5	2	28	11	8	9	48	5	13	28	8	12	3	16	33	18	10	63	21	14	18	15	1	35	42	27	2	6	14	3	12	19	11	22	19
# haplotypes (lyrata)	21	18	9	9	12	13	15	20	23	22	16.2		10.5789	# haplotypes (lyrata)	4	2	7	5	4	7	9	6	8	13	7	12	4	12	20	8	7	24	14	11	14	12	2	10	22	20	2	5	8	3	12	21	11	15	19
pi (JC) (lyrata)	0.01567	0.00659	0.00228	0.00764	0.00238	0.02613	0.0546	0.00613	0.01698	0.04057	0.017897		0.00875158	pi (JC) (lyrata)	0.00225	0.00355	0.00739	0.01564	0.00603	0.00196	0.01518	0.00466	0.00819	0.02364	0.00186	0.00292	0.00197	0.00742	0.00732	0.00156	0.00936	0.03063	0.00411	0.00631	0.00772	0.00997	4e-05	0.01552	0.02169	0.01547	0.00053	0.00322	0.0113	0.00117	0.00794	0.00853	0.00705	0.01196	0.01277
theta (W) (lyrata)	0.01202	0.00725	0.00457	0.00538	0.00414	0.03036	0.0439	0.00419	0.01306	0.05647	0.018134		0.00777158	theta (W) (lyrata)	0.00202	0.00268	0.01009	0.01124	0.00628	0.00302	0.01707	0.00634	0.00614	0.01157	0.00349	0.00515	0.00154	0.00672	0.01269	0.00717	0.00552	0.02862	0.00935	0.00552	0.00804	0.0067	0.0005	0.01408	0.01709	0.01135	0.00089	0.00427	0.00608	0.00138	0.00549	0.00872	0.00415	0.00996	0.00791
Tajima's D (lyrata)	0.96961	-0.31561	-1.4588	1.26358	-1.28291	-0.7089	0.69229	1.33973	0.9609	-1.32679	0.01331		0.230743	Tajima's D (lyrata)	0.50437	1.03299	-1.23035	1.66405	-0.21206	-1.53425	-0.57279	-0.98759	0.91378	3.03548	-1.16706	-1.14677	0.58286	0.28136	-0.05945	-2.18538	2.02363	0.15038	-1.70194	0.36194	-0.13369	1.29414	-1.00394	0.19952	0.83902	1.01231	-0.63046	-0.70311	2.54576	-0.29469	1.18598	-0.0946	1.8226	0.55848	1.66468
recombination (Rm)	4	3	0	1	1	7	13	6	6	5	4.6		2.27586	recombination (Rm)	1	1	1	3	0	1	3	2	0	4	0	1	0	3	1	0	0	14	1	2	1	3	0	0	8	4	0	0	4	0	3	6	1	2	5
Rm/site	0.00504414	0.0042735	0	0.00137174	0.00126103	0.00866337	0.0185449	0.00886263	0.00766284	0.00719424	0.00628784		0.0043055	Rm/site	0.00104493	0.00378788	0.000851789	0.00867052	0	0.000938086	0.00330396	0.00766284	0	0.00826446	0	0.00224719	0	0.00623701	0.0020202	0	0	0.0289855	0.00218341	0.00414079	0.00236407	0.0070922	0	0	0.0147059	0.00892857	0	0	0.0077821	0	0.00681818	0.01222	0.00191205	0.00447427	0.0112613
#sequences (halleri)	24	20	26	28	30	7	14	22	30	30	23.1		46.0263	#sequences (halleri)	8	10	10	8	10	8	12	10	54	56	58	62	62	56	52	60	61	52	52	58	60	56	52	56	56	54	62	62	62	60	60	52	54	56	54
# sites	793	702	572	729	793	808	701	677	783	695	725.3		512.868	# sites	957	264	1174	346	450	1066	908	261	437	484	458	445	447	481	495	468	426	483	458	483	423	423	368	513	544	448	435	349	514	447	440	491	523	447	444
S (halleri)	46	39	24	46	40	34	60	37	49	19	39.4		15.4737	S (halleri)	16	3	14	16	2	5	27	2	10	11	17	8	10	12	17	28	3	67	18	20	26	19	3	8	32	8	3	10	21	12	19	13	16	32	10
# haplotypes (halleri)	12	9	9	14	11	7	4	8	8	18	10		10.8158	# haplotypes (halleri)	4	3	3	5	3	3	8	2	11	10	8	8	13	12	16	13	3	33	13	7	21	16	4	8	17	7	4	5	23	13	13	19	14	23	10
pi (JC) (halleri)	0.01382	0.01845	0.01022	0.01644	0.01519	0.01949	0.03078	0.01478	0.01522	0.00833	0.016272		0.00788868	pi (JC) (halleri)	0.00752	0.00474	0.00253	0.02509	0.00158	0.00238	0.01144	0.00154	0.00521	0.00444	0.00346	0.00213	0.00412	0.00441	0.00465	0.01449	0.00037	0.03599	0.00779	0.01664	0.01854	0.01011	0.00302	0.00326	0.01416	0.00214	0.00145	0.00824	0.00563	0.00431	0.00879	0.00722	0.00696	0.01701	0.00314
theta (W) (halleri)	0.01567	0.01566	0.011	0.01622	0.01444	0.01863	0.02846	0.01504	0.01732	0.00869	0.016113		0.00746026	theta (W) (halleri)	0.00658	0.00402	0.00422	0.0203	0.00157	0.00181	0.00987	0.00271	0.00502	0.00495	0.00802	0.00383	0.00476	0.00543	0.0076	0.01283	0.0015	0.0307	0.0087	0.00895	0.01318	0.00978	0.0018	0.00339	0.01281	0.00392	0.00147	0.0061	0.0087	0.00576	0.00928	0.00586	0.00671	0.01562	0.00494
Tajima's D (halleri)	-0.50681	0.63694	-0.30694	-0.02039	0.10726	0.16845	0.17235	-0.1221	-0.51656	-0.16817	-0.055597		-0.00014	Tajima's D (halleri)	0.6905	0.62422	-1.84469	1.07712	0.01889	1.4282	0.65142	-1.40085	0.08417	-0.30559	-1.74398	-1.16965	-0.38069	-0.5574	-1.21638	0.35319	-1.47944	0.48473	-0.35933	2.58266	1.21678	0.07444	1.37407	-0.11952	0.30235	-1.22288	-0.02933	0.91813	-1.10869	-0.73221	-0.19091	0.66777	0.09406	0.23513	-1.03308
recombination (Rm)	6	11	2	0	1	1	0	3	3	3	3		2.05263	recombination (Rm)	1	0	0	2	0	0	0	0	3	6	0	0	2	1	5	3	0	17	2	1	5	2	0	1	3	0	0	0	5	0	3	3	1	5	1
Rm/site	0.0075662	0.0156695	0.0034965	0	0.00126103	0.00123762	0	0.00443131	0.00383142	0.00431655	0.00418102		0.00431878	Rm/site	0.00104493	0	0	0.00578035	0	0	0	0	0.00686499	0.0123967	0	0	0.00447427	0.002079	0.010101	0.00641026	0	0.0351967	0.00436681	0.00207039	0.0118203	0.00472813	0	0.00194932	0.00551471	0	0	0	0.00972763	0	0.00681818	0.00610998	0.00191205	0.0111857	0.00225225
fixed differences	0	0	4	2	2	0	0	0	0	0	0.8		3.52632	fixed differences	6	9	14	0	9	18	0	3	0	3	2	7	2	0	3	2	16	0	0	0	1	1	1	0	1	6	1	0	0	4	6	6	1	3	0
polymorphisms only in halleri	25	28	23	44	40	18	22	31	37	10	27.8		11.7632	polymorphisms only in halleri	1	3	11	14	2	5	4	1	10	10	17	8	10	9	14	23	3	32	13	16	22	16	3	5	23	8	3	7	18	12	19	12	16	21	10
polymorphisms only in lyrata	23	12	11	16	14	59	108	5	26	125	39.9		14.7368	polymorphisms only in lyrata	16	2	27	6	8	9	26	4	13	27	8	12	3	13	31	13	10	26	16	11	16	11	1	33	33	30	2	3	10	3	12	18	12	12	19
shared polymorphisms	20	11	1	2	0	16	35	8	12	9	11.4		3.65789	shared polymorphisms	4	0	3	3	0	0	24	1	0	1	0	0	0	3	3	5	0	38	5	4	5	4	0	3	10	0	0	3	4	0	0	1	0	11	0
proportion fixed polymorphisms	0	0	0.00699301	0.00274348	0.00252207	0	0	0	0	0	0.00122586		0.00704059	proportion fixed polymorphisms	0.00626959	0.0340909	0.011925	0	0.02	0.0168856	0	0.0114943	0	0.00619835	0.00436681	0.0157303	0.00447427	0	0.00606061	0.0042735	0.0375587	0	0	0	0.00236407	0.00236407	0.00271739	0	0.00183824	0.0133929	0.00229885	0	0	0.00894855	0.0136364	0.01222	0.00191205	0.00671141	0
proportion shared polymorphisms	0.0252207	0.0156695	0.00174825	0.00274348	0	0.019802	0.0499287	0.0118168	0.0153257	0.0129496	0.0155205		0.00697472	proportion shared polymorphisms	0.00417973	0	0.00255537	0.00867052	0	0	0.0264317	0.00383142	0	0.00206612	0	0	0	0.00623701	0.00606061	0.0106838	0	0.0786749	0.010917	0.00828157	0.0118203	0.00945626	0	0.00584795	0.0183824	0	0	0.00859599	0.0077821	0	0	0.00203666	0	0.0246085	0
[truncated: 4 more columns]
